# Supplementary material for: Biosynthesis of Silver Nanoparticles Using Seasonal Samples of Sonoran Desert Propolis: Evaluation of Its Antibacterial Activity against Clinical Isolates of Multi-Drug Resistant Bacteria
Source: MDPI journal article supplement (doi:10.3390/pharmaceutics14091853), 2022-09-02
Supplement: s1 [file s1]

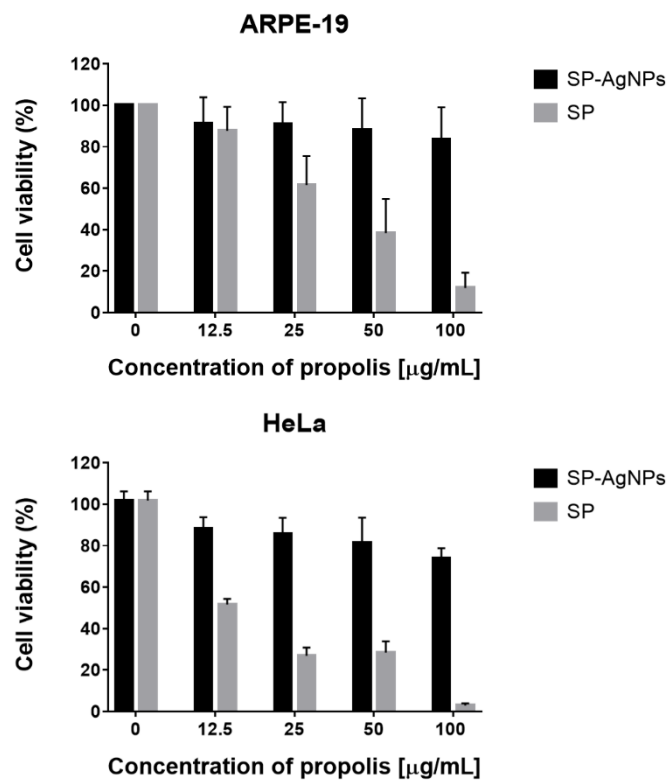

**Supplementary Figure S2.** Cytotoxic activity of SPw-AgNPs and SP against ARPE-19 and HeLa cell lines. Data represent the mean of three independent experiments  $\pm$  standard deviation.
