# Supplementary material for: Biosynthesis of Silver Nanoparticles Using Seasonal Samples of Sonoran Desert Propolis: Evaluation of Its Antibacterial Activity against Clinical Isolates of Multi-Drug Resistant Bacteria
Source: MDPI journal article supplement (doi:10.3390/pharmaceutics14091853), 2022-09-02
Supplement: s1 [file s1]

**Supplementary Table S1:** phenotypic and genotypic characteristics of analyzed clinical isolates of multidrug resistant *E. coli*.

| Strain             | Virotype                                                                               | Phenotype                                    | Resistance genotype                                             | Resistotype                                                                                                    | MDR classification |
|--------------------|----------------------------------------------------------------------------------------|----------------------------------------------|-----------------------------------------------------------------|----------------------------------------------------------------------------------------------------------------|--------------------|
| <i>E. coli</i> 2   | <i>hlyA, kpsM, vat, cnf-1, traT, iucD, iutA, feoB</i>                                  | Biofilm, Motility, ESBL+                     | CTX-M 1 y 8, CTX-M-9. TEM, CTX-M-2, CTX-M-151, qnrB, aac(6')-Ib | GM, CIP, NOR, LVX, TSX, AMP, CFX, CFZ, CTX, CRO, FEP, ATM, AMC, AMS, TE                                        | XDR                |
| <i>E. coli</i> 27  | <i>fimH, sfaD/focC, fliCD, sat, kpsM, traT, iroN, iucD, fyuA, feoB</i>                 | Biofilm, Motility, CAR+                      | CTX-M 1 y 8, CTX-M-2                                            | AMK, GM, CIP, NOR, LVX, TSX, AMP, CX, CFZ, CTX, CRO, AMC, MEM                                                  | XDR                |
| <i>E. coli</i> 29  | <i>fimH, sfaD/focC, fliCD, cnf-1, traT, iha, feoB</i>                                  | Biofilm, Motility, Capsule, ESBL+            | CTX-M-2, TEM                                                    | AMK, GM, CIP, NOR, LVX, TSX, AMP, CFX, CTX, AMC, TE                                                            | MDR                |
| <i>E. coli</i> 34  | <i>fimH, papG-II, fliCD, sat, hlyA, kpsM, vat, cnf-1, traT, iroN, iucD, fyuA, feoB</i> | Biofilm, Motility, Capsule, Hemolysis, ESBL+ | CTX-M-2                                                         | AMK, GM, CIP, NOR, LVX, TSX, MAC, AMP, CFX, CFZ, CTX, CRO, AMC, TE                                             | XDR                |
| <i>E. coli</i> 37  | <i>fimH, fliCD, sat, hlyA, kpsM, vat, iroN, iucD, fyuA, iha, feoB</i>                  | Biofilm, Motility, Capsule, Hemolysis, ESBL+ | TEM, CTX-M-2                                                    | TSX, AMP, AMC, AMS                                                                                             | MDR                |
| <i>E. coli</i> PNG | <i>iucD, sat, fimH, iha, papG, papA, hlyA</i>                                          | Motility                                     | -                                                               | AMK, GM, NET, AN, CIP, OFX, NOR, LVX, TSX, MAC, C, AM, CF, CFX, CFZ, CTX, CRO, FEP, ATM, AMC, FOS, CL, TE, ETP | PDR                |

***fimH***: Type 1 pilus adhesin; ***sfaD/focC***: F1C pilus; ***papG-II***: Type P pilus Adhesin allele 2; ***fliCD***: Flagellin subunit/flagellar cap; ***hlyA***:  $\alpha$ -hemolysin; ***kpsM***: Capsular variant; ***vat***: Autotransporter secreted toxin; ***cnf-1***: Necrotizing cytotoxic factor; ***traT***: Complement resistance associated protein; ***iucD***: Aerobactin; ***iutA***: Aerobactin receptor; ***feoB***: Ferrous iron transporter B; ***fyuA***: Ferric yersiniabactin uptake receptor; ***sat***: Secreted autotransporter toxin; ***iha***: Enterobactin; ***iroN***: Salmochelin; ***papA***: Type P pilus; **ESBL+**: Extended spectrum betalactamase phenotype; **CAR+**: Positive carbapenemases phenotype; **CTX-M**; **TEM**; **SHV**:  $\beta$ -lactamases associated genes; **qnrB**; **aac(6')-Ib**: Quinolones resistance associated genes (plasmids). **GM**: Gentamicin; **CIP**: Ciprofloxacin; **NOR**: Norfloxacin; **LVX**: Levofloxacin; **TSX**: Cotrimoxazole; **AMP**: Ampicillin; **CFX**: Cefuroxime; **CTX**: Cefotaxime; **CRO**: Ceftriaxone; **FEP**: Cefepime; **ATM**: Aztreonam; **AMC**: Amoxicillin - Clavulanic acid; **AMS**: Ampicillin-Sulbactam; **TE**: Tetracycline; **AMK**: amikacin; **CF**: Cephalothin; **CL**: Colistin; **ETP**: Ertapenem; **MEM**: Meropenem; **MDR**: Multi-drug resistant; **XDR**: Extensively drug-resistant; **PDR**: Pandrug-resistant.
